# Supplementary material
Source: Research Square preprint supplement (doi:10.21203/rs.3.rs-9403275/v1)
Supplement: Supplementary file 1 [file 3e2af377ff5997330f84695b.docx]

Table 2. Example of Data Analysis Using Colaizzi’s Method

| Excerpts from the Reflection Journal (manuscript) | Read repeatedly and find important sentences | Concretize meaning | Cluster theme | Write a detailed description | Create a basic structure | Seeking verification of the basic structure |
| --- | --- | --- | --- | --- | --- | --- |
| ·Implementing the flipped classroom naturally enhanced my self-directed learning ability. Instead of passively listening to lectures, I began to study independently. As I gradually understood the material on my own, I explored various study strategies and developed a personalized learning style. Completing the assignments provided by the professor also led to repeated review of the content, which contributed to more effective academic achievement.  (Participant 13)  ·Although I previously felt nervous during each class session, the flipped classroom helped me gain confidence in my learning. I became more comfortable expressing what I knew and openly sharing my questions and uncertainties during class.  (Participant 27)  ·I learned how to organize my learning process, largely through the use of Cornell Notes. This new method of summarizing was refreshing, and as I continuously recorded key terms and synthesized the overall course content, I experienced the benefits of structuring my thoughts. I learned how to summarize and systematize lessons.  (Participant 29) | ·Implementing the flipped classroom naturally enhanced my self-directed learning ability. Instead of passively listening to lectures, I began to study independently. As I gradually understood the material on my own, I explored various study strategies and developed a personalized learning style. Completing the assignments provided by the professor also led to repeated review of the content, which contributed to more effective academic achievement.  (Participant 13)  ·Although I previously felt nervous during each class session, the flipped classroom helped me gain confidence in my learning. I became more comfortable expressing what I knew and openly sharing my questions and uncertainties during class.  (Participant 27)  ·I learned how to organize my learning process, largely through the use of Cornell Notes. This new method of summarizing was refreshing, and as I continuously recorded key terms and synthesized the overall course content, I experienced the benefits of structuring my thoughts. I learned how to summarize and systematize lessons.  (Participant 29) | Code 1. Developing self-directed learning skills.  Code 2. Gaining experience in structuring learning content on one's own. | Learn how to lead your own learning by becoming the main character. | By moving away from passively accepting content, I developed a desire to learn about things I didn't know, and by learning how to organize notes and study, I was able to organize the learning content in my own way. | Find yourself learning on your own | The identified themes were returned to the participants for validation (member checking). To enhance the credibility of the findings, participants were asked whether the results accurately reflected their lived experiences. When discrepancies were noted, the researchers revisited the analysis and re-examined the data step by step from the initial stages of analysis. |
