# Supplementary material
Source: Research Square preprint supplement (doi:10.21203/rs.3.rs-9403275/v1)
Supplement: Supplementary file 2 [file a053ba9ead01f364f4e5e6f0.docx]

**Reflective Journal Guidelines (Flipped Classroom Experience)**

Please write a reflective journal of **500–800 Korean characters** in response to the questions below.
You are encouraged to **write freely and honestly** based on your own learning experience. There are no right or wrong answers.

**1.** What aspects of the flipped classroom did you find most beneficial?
Please describe specific activities, learning methods, or experiences that helped you understand the content or engage more effectively in the course.

**2.** What difficulties or challenges did you experience during the flipped classroom?
You may include challenges related to pre-class preparation, in-class activities, or managing your learning process.

**3.** What did you learn from participating in the flipped classroom?
Please reflect on any changes in your knowledge, skills, learning strategies, or attitudes toward learning.

**4.** How would you evaluate your overall experience with the flipped classroom?
Please include any suggestions for improvement or additional comments you would like to share.
