# Supplementary material
Source: Research Square preprint supplement (doi:10.21203/rs.3.rs-9403275/v1)
Supplement: Supplementary file 3 [file bff0fd9c9aaba6055e8b99e5.docx]

**COREQ: Consolidated criteria for reporting qualitative research (32-item checklist)**

**Domain 1. Research team and reflexivity**

**1. Interviewer/facilitator**
Data were collected through individual reflective journals rather than interviews or focus groups. The principal researcher designed the reflective writing prompt and oversaw the data collection process.

**2. Credentials**
The principal researcher held a PhD.

**3. Occupation**
The principal researcher was a professor at the time of the study.

**4. Gender**
Female.

**5. Experience and training**
The researcher had experience in qualitative research, including qualitative research education, workshop participation, and publication of qualitative research articles.

**6. Relationship established**
Yes. A relationship existed prior to the study because the principal researcher was also the course instructor in the flipped classroom.

**7. Participant knowledge of the interviewer**
Participants knew the purpose of the study, the reason for conducting it, and that the principal researcher was also the course instructor. They were informed that participation or non-participation would not affect course grades or academic evaluation.

**8. Interviewer characteristics**
The principal researcher was also the course instructor, and this dual role was recognised as a potential influence on both data generation and interpretation. Reflexive attention was maintained throughout the study to minimise the influence of prior assumptions and interpretive bias.

**Domain 2. Study design**

**9. Methodological orientation and theory**
This study was grounded in descriptive phenomenology, and data were analysed using Colaizzi’s phenomenological method. The study was also informed by social constructivism as a theoretical framework for understanding flipped classroom learning.

**Participant selection**

**10. Sampling**
Participants were recruited using convenience sampling from students enrolled in the flipped classroom-based community health nursing course.

**11. Method of approach**
Recruitment was conducted through an announcement posted on a social networking service bulletin board. Students who expressed interest contacted the researcher by text message or telephone.

**12. Sample size**
Forty-eight undergraduate nursing students participated in the study.

**13. Non-participation**
A total of 68 students were enrolled in the flipped classroom course, and 48 agreed to participate in the study. Information on the reasons for non-participation was not collected.

**Setting**

**14. Setting of data collection**
Data were collected through individual reflective journals submitted by undergraduate nursing students after participation in the flipped classroom course.

**15. Presence of non-participants**
Not applicable. Data were collected through written reflective journals rather than interviews or focus groups.

**16. Description of sample**
The sample comprised 48 undergraduate nursing students, including 8 male and 40 female students, aged 22 to 27 years, with a mean age of 23 years.

**Data collection**

**17. Interview guide**
Yes. Participants were asked to respond in writing to a reflective prompt: “Please describe what you found beneficial, what you found challenging, and what you learned from the flipped classroom.” Pilot testing of the prompt was not reported.

**18. Repeat interviews**
Not applicable. Data were collected once through individual reflective journals.

**19. Audio/visual recording**
No. Audio or visual recording was not used because data were collected in written form through reflective journals.

**20. Field notes**
Reflexive notes were maintained during data analysis to document emerging assumptions, interpretive decisions, and points requiring re-examination in relation to the original journals. Traditional field notes during interviews were not applicable.

**21. Duration**
The data collection period was from January 1 to January 30, 2024.

**22. Data saturation**
Rather than using a strict claim of saturation, analytic adequacy was judged to have been achieved when later journals yielded no substantially new meanings and the experiential patterns were sufficiently rich and coherent to describe the phenomenon.

**23. Transcripts returned**
Not applicable. No interview or focus group transcripts were generated because data were collected through written reflective journals.

**Domain 3. Analysis and findings**

**Data analysis**

**24. Number of data coders**
One researcher conducted the primary analysis. The analytic process and interpretations were additionally reviewed by two nursing professors with extensive experience in qualitative research.

**25. Description of the coding tree**
Yes. The analytic process from significant statements to formulated meanings, themes, and theme clusters was described, and an example of the analytic process was presented in Table 2.

**26. Derivation of themes**
Themes were derived inductively from the data through Colaizzi’s phenomenological analysis.

**27. Software**
No qualitative data analysis software was reported.

**28. Participant checking**
Yes. Preliminary findings were reviewed by three participants to assess whether the interpretations were consistent with their learning experiences and intended meanings.

**Reporting**

**29. Quotations presented**
Yes. Participant quotations were presented to illustrate the findings, and each quotation was identified by participant number.

**30. Data and findings consistent**
Yes. The findings were grounded in the data, and consistency between the original journals, formulated meanings, and themes was maintained throughout the analytic process.

**31. Clarity of major themes**
Yes. Four overarching themes were clearly presented in the Results section.

**32. Clarity of minor themes**
Yes. Subthemes were clearly presented under each major theme, and diverse aspects of the learning experience, including both growth and burden, were described.
